# Supplementary material for: Small Molecule Docking of DNA Repair Proteins Associated with Cancer Survival following PCNA Metagene Adjustment: A Potential Novel Class of Repair Inhibitors
Source: Preprints.org preprint supplement (doi:10.20944/preprints201901.0062.v1), 2019-01-08
Supplement: Supplementary file 1 [file supplementary]

**Table 3. AML: List of physio-chemical properties and predicted toxicology and ADME for top 20 ligands. Toxicology and ADME predictions are probabilities in the range [0,1]\*.**

| Name   | MW     | LogP  | LogS  | TPSA   | Rotb | HBD | HBA | BBB  | HIA  | HERG | AMES | FHM  | HBT  | TPT  | CYP1A2 | CYP2C9 | CYP2C19 | CYP2D6 | CYP3A4 |
|--------|--------|-------|-------|--------|------|-----|-----|------|------|------|------|------|------|------|--------|--------|---------|--------|--------|
| 408383 | 372.3  | 3.87  | -4.67 | 66.48  | 4    | 1   | 3   | 0.99 | 0.98 | 0.16 | 0.16 | 1    | 0.24 | 0.98 | 0.68   | 0.67   | 0.66    | 0.27   | 0.42   |
| 676443 | 369.38 | -0.69 | -5.12 | 112.58 | 4    | 3   | 5   | 0.99 | 0.94 | 0.61 | 0.61 | 0.03 | 0.84 | 0    | 0.75   | 0.22   | 0.29    | 0.14   | 0.33   |
| 627757 | 370.49 | 2.29  | -3.95 | 38.33  | 2    | 1   | 2   | 1    | 0.62 | 0.01 | 0.01 | 0    | 0.8  | 0    | 0.14   | 0.13   | 0.27    | 0.16   | 0.37   |
| 749518 | 304.35 | 0.37  | -3.84 | 69.11  | 4    | 2   | 2   | 0.94 | 0.99 | 0.01 | 0.01 | 0.35 | 0.93 | 0.88 | 0.87   | 0.38   | 0.63    | 0.06   | 0.4    |
| 641596 | 314.72 | 1.33  | -4.35 | 57.53  | 3    | 2   | 5   | 1    | 1    | 0.01 | 0.01 | 1    | 0    | 0.95 | 0.4    | 0.56   | 0.6     | 0.03   | 0.24   |
| 116535 | 327.21 | 4.79  | -5.89 | 53.49  | 2    | 2   | 2   | 1    | 0.98 | 0.95 | 0.95 | 0.41 | 0.02 | 0.96 | 0.76   | 0.42   | 0.55    | 0.12   | 0.24   |
| 722325 | 374.35 | 1.96  | -5.23 | 133.11 | 5    | 1   | 4   | 0.95 | 0.98 | 0.1  | 0.1  | 0.03 | 0.14 | 0.88 | 0.85   | 0.19   | 0.4     | 0.08   | 0.31   |
| 666597 | 296.27 | 2.73  | -3.34 | 97.99  | 2    | 4   | 5   | 0.89 | 0.98 | 0.04 | 0.04 | 0.99 | 0.7  | 0.87 | 0.55   | 0.13   | 0.36    | 0.08   | 0.18   |
| 105132 | 332.35 | 3.43  | -5.2  | 43.37  | 1    | 0   | 3   | 0.93 | 0.99 | 0.35 | 0.35 | 0.36 | 0.99 | 0.95 | 0.83   | 0.57   | 0.62    | 0.28   | 0.53   |
| 673181 | 290.32 | 1.59  | -5.19 | 48.78  | 3    | 2   | 4   | 0.97 | 0.98 | 0.09 | 0.09 | 0.08 | 0.22 | 0.88 | 0.91   | 0.2    | 0.44    | 0.55   | 0.28   |
| 609964 | 275.34 | 4.47  | -5.48 | 29.1   | 2    | 1   | 2   | 1    | 0.98 | 0.13 | 0.13 | 0.79 | 0.93 | 0.98 | 0.49   | 0.22   | 0.42    | 0.36   | 0.25   |
| 168470 | 308.29 | 2.46  | -4.86 | 112.48 | 4    | 2   | 3   | 0.73 | 0.98 | 0.59 | 0.59 | 0.34 | 0.29 | 0.89 | 0.96   | 0.35   | 0.49    | 0.09   | 0.32   |
| 267461 | 302.28 | 2.43  | -2.04 | 100.9  | 2    | 2   | 6   | 0.69 | 0.96 | 0.01 | 0.01 | 1    | 0.98 | 0.94 | 0.18   | 0.3    | 0.4     | 0.04   | 0.41   |
| 743508 | 378.4  | 1.54  | -5.51 | 64.63  | 6    | 1   | 5   | 0.81 | 0.9  | 0.01 | 0.01 | 0.92 | 0.81 | 0.95 | 0.93   | 0.79   | 0.75    | 0.07   | 0.8    |
| 695267 | 350.4  | -2.92 | -4.37 | 129.38 | 2    | 4   | 4   | 1    | 0.95 | 0.36 | 0.36 | 0.98 | 0.49 | 0.93 | 0.76   | 0.14   | 0.5     | 0.3    | 0.46   |
| 707801 | 303.33 | 3.3   | -2.68 | 50.72  | 1    | 2   | 4   | 1    | 0.82 | 0.55 | 0.55 | 0.77 | 0.97 | 0.94 | 0.05   | 0.43   | 0.2     | 0.53   | 0.75   |
| 718154 | 330.34 | 3.74  | -4.53 | 69.89  | 3    | 2   | 4   | 0.96 | 0.96 | 0.07 | 0.07 | 0.9  | 0.37 | 0.88 | 0.86   | 0.3    | 0.45    | 0.1    | 0.24   |
| 59937  | 262.3  | 4.73  | -5.89 | 26.3   | 3    | 0   | 2   | 1    | 0.98 | 0.09 | 0.09 | 0.8  | 0.7  | 0.98 | 0.77   | 0.18   | 0.37    | 0.26   | 0.23   |
| 684700 | 360.29 | 0.13  | -4.94 | 40.13  | 5    | 0   | 3   | 0.95 | 0.99 | 0.57 | 0.57 | 0.73 | 0.15 | 0.96 | 0.62   | 0.24   | 0.65    | 0.09   | 0.75   |
| 656591 | 315.32 | 4.39  | -5.67 | 47.56  | 0    | 1   | 3   | 0.83 | 1    | 0.09 | 0.09 | 0.01 | 0.77 | 0.87 | 0.61   | 0.34   | 0.78    | 0.23   | 0.61   |

\*Listed are NSC-408383, NSC-676443, NSC-627757, NSC-749518, NSC-641596, NSC-116535, NSC-722325, NSC-666597, NSC-105132, NSC-673181, NSC-609964, NSC-168470, NSC-267461, NSC-743508, NSC-695267, NSC-707801, NSC-718154, NSC-59937, NSC-684700, and NSC-656591. Receptor binding energies, promiscuity, genotoxicity, skin sensitivity, and aquatic toxicity from SMARTS hits not listed.

**Table 4. Breast cancer: List of physio-chemical properties and predicted toxicology and ADME for top 20 ligands. Toxicology and ADME predictions are probabilities in the range [0,1]\*.**

| Name   | MW     | LogP  | LogS  | TPSA   | Rotb | HBD | HBA | BBB  | HIA  | HERG | AMES | FHM  | HBT  | TPT  | CYP1A2 | CYP2C9 | CYP2C19 | CYP2D6 | CYP3A4 |
|--------|--------|-------|-------|--------|------|-----|-----|------|------|------|------|------|------|------|--------|--------|---------|--------|--------|
| 749518 | 304.35 | 0.37  | -3.84 | 69.11  | 4    | 2   | 2   | 0.94 | 0.99 | 0.01 | 0.01 | 0.35 | 0.93 | 0.88 | 0.87   | 0.38   | 0.63    | 0.06   | 0.4    |
| 657704 | 376.32 | 2.23  | -3.57 | 113.01 | 2    | 2   | 5   | 0.1  | 1    | 0.03 | 0.03 | 1    | 0.98 | 0.94 | 0.43   | 0.59   | 0.54    | 0.09   | 0.53   |
| 716825 | 368.48 | -0.59 | -5.17 | 29.1   | 2    | 1   | 3   | 0.96 | 1    | 0.07 | 0.07 | 0.01 | 0.03 | 0.96 | 0.66   | 0.8    | 0.83    | 0.09   | 0.79   |
| 669736 | 297.43 | 4.81  | -4.37 | 20.31  | 3    | 0   | 2   | 0.99 | 0.98 | 0.09 | 0.09 | 1    | 0.83 | 0.98 | 0.1    | 0.05   | 0.3     | 0.5    | 0.2    |
| 726904 | 308.76 | 4.19  | -5.56 | 29.1   | 1    | 1   | 1   | 0.99 | 0.96 | 0.47 | 0.47 | 1    | 0.01 | 0.98 | 0.64   | 0.75   | 0.71    | 0.22   | 0.51   |
| 362664 | 251.28 | 2.62  | -4.42 | 44.7   | 2    | 1   | 2   | 1    | 0.98 | 0.68 | 0.68 | 0.41 | 0.02 | 0.96 | 0.76   | 0.31   | 0.5     | 0.12   | 0.24   |
| 668836 | 390.52 | 4.05  | -4.62 | 37.38  | 1    | 1   | 2   | 0.94 | 0.99 | 0.08 | 0.08 | 0    | 0.16 | 0.98 | 0.3    | 0.39   | 0.53    | 0.29   | 0.46   |
| 649750 | 334.33 | -0.28 | -5.7  | 41.46  | 3    | 1   | 4   | 0.95 | 0.27 | 0.4  | 0.4  | 1    | 0.59 | 0.95 | 0.95   | 0.36   | 0.94    | 0.23   | 0.24   |
| 684322 | 206.24 | 4.31  | -4.95 | 47.7   | 0    | 2   | 2   | 1    | 0.97 | 0.04 | 0.04 | 1    | 0.7  | 0.94 | 0.61   | 0.09   | 0.21    | 0.18   | 0.09   |
| 50648  | 308.29 | 3.53  | -5.09 | 117.19 | 4    | 2   | 2   | 0.97 | 0.93 | 0.03 | 0.03 | 0.78 | 0.11 | 0.95 | 0.82   | 0.34   | 0.43    | 0.2    | 0.44   |
| 766871 | 332.32 | -3.09 | -4.41 | 49.33  | 4    | 2   | 6   | 0.26 | 1    | 0.05 | 0.05 | 0    | 0.05 | 0.88 | 0.68   | 0.42   | 0.48    | 0.07   | 0.49   |
| 382584 | 299.3  | 3.71  | -4.65 | 134.62 | 3    | 1   | 2   | 1    | 0.99 | 0.09 | 0.09 | 0    | 0.31 | 0.96 | 0.9    | 0.5    | 0.71    | 0.03   | 0.23   |
| 98710  | 290.32 | 0.72  | -5.19 | 76.76  | 3    | 2   | 4   | 1    | 0.99 | 0.03 | 0.03 | 0.88 | 0.22 | 0.89 | 0.96   | 0.21   | 0.38    | 0.1    | 0.27   |
| 110383 | 244.31 | 3.26  | -5.9  | 0      | 0    | 0   | 0   | 1    | 0.98 | 0.08 | 0.08 | 0.31 | 0.36 | 0.95 | 0.82   | 0.1    | 0.41    | 0.28   | 0.21   |
| 684969 | 303.31 | 1.95  | -5.14 | 50.09  | 3    | 1   | 4   | 0.06 | 0.9  | 0.14 | 0.14 | 0.37 | 0.25 | 0.96 | 0.83   | 0.19   | 0.5     | 0.21   | 0.52   |
| 673841 | 387.2  | -3.42 | -3.41 | 102.78 | 2    | 4   | 5   | 0.99 | 1    | 0.07 | 0.07 | 0.01 | 0.7  | 0.97 | 0.65   | 0.46   | 0.33    | 0.04   | 0.1    |
| 657996 | 396.42 | 0.58  | -3.33 | 138.94 | 3    | 5   | 6   | 1    | 0.55 | 0.48 | 0.48 | 1    | 0.22 | 0.95 | 0.42   | 0.85   | 0.86    | 0.18   | 0.83   |
| 652182 | 396.39 | 3.39  | -3.94 | 97.66  | 6    | 1   | 7   | 0.78 | 0.96 | 0.03 | 0.03 | 1    | 0.66 | 0.98 | 0.28   | 0.46   | 0.41    | 0.07   | 0.6    |
| 699471 | 343.17 | 3.4   | -5.51 | 49.33  | 0    | 3   | 2   | 0.94 | 1    | 0.43 | 0.43 | 0    | 0.01 | 0.98 | 0.89   | 0.64   | 0.85    | 0.52   | 0.56   |
| 694620 | 365.36 | 1.1   | -5.33 | 94.16  | 4    | 0   | 2   | 0.86 | 0.94 | 0.04 | 0.04 | 0.6  | 0.05 | 1    | 0.8    | 0.37   | 0.58    | 0.03   | 0.51   |

\*Listed are NSC-749518, NSC-657704, NSC-716825, NSC-669736, NSC-726904, NSC-362664, NSC-668836, NSC-649750, NSC-684322, NSC-50648, NSC-766871, NSC-382584, NSC-98710, NSC-110383, NSC-684969, NSC-673841, NSC-657996, NSC-652182, NSC-699471, and NSC-694620. Receptor binding energies, promiscuity, genotoxicity, skin sensitivity, and aquatic toxicity from SMARTS hits not listed.

**Table 5. Lung cancer: List of physio-chemical properties and predicted toxicology and ADME for top 20 ligands. Toxicology and ADME predictions are probabilities in the range [0,1]\*.**

| Name   | MW     | LogP  | LogS  | TPSA   | Rotb | HBD | HBA | BBB  | HIA  | HERG | AMES | FHM  | HBT  | TPT  | CYP1A2 | CYP2C9 | CYP2C19 | CYP2D6 | CYP3A4 |
|--------|--------|-------|-------|--------|------|-----|-----|------|------|------|------|------|------|------|--------|--------|---------|--------|--------|
| 720447 | 278.31 | 2.32  | -5.3  | 34.14  | 2    | 2   | 2   | 0.99 | 0.94 | 0.01 | 0.01 | 1    | 0.99 | 0.98 | 0.85   | 0.53   | 0.36    | 0.02   | 0.25   |
| 107129 | 358.51 | 4.7   | -2.77 | 46.53  | 1    | 1   | 2   | 0.99 | 0.94 | 0.02 | 0.02 | 1    | 0.97 | 0.69 | 0.05   | 0.02   | 0.12    | 0.02   | 0.04   |
| 351710 | 261.34 | 2.56  | -5.83 | 0      | 0    | 1   | 0   | 1    | 0.98 | 0.6  | 0.6  | 0.18 | 0.27 | 0.95 | 0.77   | 0.16   | 0.45    | 0.48   | 0.21   |
| 719502 | 249.27 | 1.22  | -4.63 | 17.07  | 0    | 1   | 2   | 0.83 | 0.98 | 0.28 | 0.28 | 0.96 | 0.27 | 1    | 0.61   | 0.18   | 0.2     | 0.08   | 0.18   |
| 117917 | 296.28 | 3.33  | -4.99 | 121.35 | 3    | 2   | 2   | 1    | 0.98 | 0.51 | 0.51 | 0.76 | 0.02 | 0.95 | 0.88   | 0.34   | 0.46    | 0.04   | 0.34   |
| 703104 | 252.27 | -1.7  | -4.47 | 24.39  | 3    | 2   | 4   | 1    | 0.69 | 0.04 | 0.04 | 0.99 | 0.21 | 0    | 0.85   | 0.16   | 0.45    | 0.35   | 0.14   |
| 669455 | 298.21 | -5.19 | -2.71 | 90.92  | 2    | 0   | 4   | 0.99 | 0.38 | 0.04 | 0.04 | 1    | 0.35 | 0.92 | 0.65   | 0.15   | 0.27    | 0.05   | 0.21   |
| 695333 | 399.9  | 3.17  | -5.01 | 85.58  | 6    | 2   | 2   | 0.16 | 0.78 | 0.3  | 0.3  | 0    | 0.05 | 0    | 0.41   | 0.67   | 0.84    | 0.05   | 0.7    |
| 732287 | 329.7  | 2.53  | -5.06 | 55.12  | 4    | 2   | 2   | 1    | 0.98 | 0.14 | 0.14 | 0    | 0.71 | 0.88 | 0.82   | 0.45   | 0.68    | 0.08   | 0.7    |
| 91397  | 396.91 | 4.31  | -5.77 | 35.94  | 6    | 1   | 3   | 0.87 | 0.95 | 0.17 | 0.17 | 0.34 | 0.38 | 0.97 | 0.45   | 0.34   | 0.53    | 0.62   | 0.33   |
| 680553 | 311.31 | 1.64  | -5.71 | 38.33  | 5    | 1   | 3   | 0.98 | 1    | 0.01 | 0.01 | 0.16 | 0.02 | 0    | 0.94   | 0.34   | 0.39    | 0.02   | 0.3    |
| 715722 | 394.23 | 3.01  | -5.16 | 55.87  | 2    | 0   | 2   | 0.64 | 0.89 | 0.49 | 0.49 | 0.88 | 0.27 | 0.95 | 0.79   | 0.14   | 0.3     | 0.3    | 0.59   |
| 653384 | 400.42 | 4.02  | -4.01 | 64.61  | 5    | 0   | 7   | 1    | 0.99 | 0.07 | 0.07 | 1    | 0.94 | 0.94 | 0.46   | 0.33   | 0.39    | 0.17   | 0.33   |
| 627505 | 291.37 | 2.58  | -5.85 | 9.23   | 1    | 1   | 1   | 0.95 | 0.98 | 0.58 | 0.58 | 0.4  | 0.27 | 0.95 | 0.75   | 0.25   | 0.58    | 0.47   | 0.31   |
| 20527  | 371.02 | 3.44  | -4.89 | 49.33  | 3    | 2   | 2   | 0.97 | 0.98 | 0.03 | 0.03 | 0.48 | 0.11 | 0.95 | 0.63   | 0.39   | 0.49    | 0.22   | 0.35   |
| 4290   | 313.37 | 2.88  | -5.13 | 84.93  | 8    | 0   | 1   | 1    | 0.98 | 0.38 | 0.38 | 0.18 | 0.27 | 0.98 | 0.64   | 0.37   | 0.45    | 0.19   | 0.33   |
| 706989 | 296.34 | 2.68  | -4.59 | 27.69  | 3    | 0   | 3   | 0.97 | 0.96 | 0.24 | 0.24 | 0.21 | 0.27 | 0.98 | 0.73   | 0.34   | 0.6     | 0.54   | 0.56   |
| 648273 | 302.37 | 2.77  | -4.94 | 83.13  | 6    | 1   | 2   | 0.99 | 0.98 | 0.35 | 0.35 | 0    | 0.16 | 0.98 | 0.83   | 0.17   | 0.48    | 0.71   | 0.65   |
| 709923 | 244.29 | 1.46  | -4.69 | 26.02  | 1    | 1   | 1   | 1    | 0.97 | 0.06 | 0.06 | 0.18 | 0.37 | 0.89 | 0.85   | 0.34   | 0.69    | 0.1    | 0.38   |
| 717889 | 270.39 | 1.82  | -2.31 | 74.46  | 0    | 1   | 1   | 0.99 | 0.94 | 0.04 | 0.04 | 0    | 0.4  | 0.5  | 0.51   | 0.45   | 0.52    | 0.08   | 0.11   |

\*Listed are NSC-720447, NSC-107129, NSC-351710, NSC-719502, NSC-117917, NSC-703104, NSC-669455, NSC-695333, NSC-732287, NSC-91397, NSC-680553, NSC-715722, NSC-653384, NSC-627505, NSC-20527, NSC-4290, NSC-706989, NSC-648273, NSC-709923, and NSC-717889. Receptor binding energies, promiscuity, genotoxicity, skin sensitivity, and aquatic toxicity from SMARTS hits not listed.

**Table 6. Colon cancer: List of physio-chemical properties and predicted toxicology and ADME for top 20 ligands. Toxicology and ADME predictions are probabilities in the range [0,1]\*.**

| Name   | MW     | LogP  | LogS  | TPSA  | Rotb | HBD | HBA | BBB  | HIA  | HERG | AMES | FHM  | HBT  | TPT  | CYP1A2 | CYP2C9 | CYP2C19 | CYP2D6 | CYP3A4 |
|--------|--------|-------|-------|-------|------|-----|-----|------|------|------|------|------|------|------|--------|--------|---------|--------|--------|
| 771557 | 355.39 | 1.83  | -5.31 | 72.19 | 3    | 2   | 3   | 1    | 0.98 | 0.43 | 0.43 | 0    | 0.02 | 0.98 | 0.79   | 0.72   | 0.77    | 0.37   | 0.93   |
| 768051 | 360.38 | 2.59  | -5.79 | 35.82 | 4    | 1   | 3   | 1    | 0.99 | 0.07 | 0.07 | 0.47 | 0.45 | 0.96 | 0.89   | 0.12   | 0.57    | 0.45   | 0.76   |
| 754670 | 337.4  | 1.41  | -5.09 | 72.19 | 3    | 2   | 3   | 1    | 0.98 | 0.26 | 0.26 | 0    | 0.02 | 0.98 | 0.81   | 0.62   | 0.74    | 0.38   | 0.93   |
| 722316 | 315.37 | 1.37  | -5.86 | 24.39 | 3    | 1   | 3   | 0.99 | 0.88 | 0.49 | 0.49 | 0    | 0.2  | 0.95 | 0.82   | 0.27   | 0.37    | 0.39   | 0.22   |
| 684405 | 345.28 | 0.75  | -3.2  | 88.59 | 5    | 1   | 5   | 0.42 | 0.98 | 0.04 | 0.04 | 0    | 0.59 | 0.95 | 0.47   | 0.32   | 0.4     | 0.08   | 0.33   |
| 676188 | 250.3  | 2.64  | -5.79 | 17.07 | 1    | 1   | 2   | 0.9  | 0.98 | 0.29 | 0.29 | 0.02 | 0.06 | 0.89 | 0.9    | 0.13   | 0.46    | 0.2    | 0.4    |
| 754664 | 385.87 | 2.56  | -5.92 | 72.19 | 3    | 2   | 3   | 1    | 0.98 | 0.27 | 0.27 | 0    | 0    | 0.98 | 0.81   | 0.81   | 0.87    | 0.38   | 0.94   |
| 753802 | 371.84 | 2.05  | -5.59 | 72.19 | 3    | 2   | 3   | 1    | 0.98 | 0.36 | 0.36 | 0    | 0    | 0.98 | 0.81   | 0.81   | 0.87    | 0.38   | 0.93   |
| 382053 | 359.43 | -1.54 | -5.77 | 52.04 | 5    | 2   | 4   | 0.88 | 0.98 | 0.07 | 0.07 | 1    | 0.01 | 0.95 | 0.69   | 0.48   | 0.56    | 0.31   | 0.49   |
| 754567 | 355.39 | 1.83  | -5.31 | 72.19 | 3    | 2   | 3   | 1    | 0.98 | 0.55 | 0.55 | 0    | 0.02 | 0.98 | 0.79   | 0.62   | 0.74    | 0.4    | 0.93   |
| 665497 | 368.34 | 4.23  | -4.27 | 72.45 | 3    | 0   | 6   | 0.93 | 0.99 | 0.18 | 0.18 | 1    | 0.98 | 0.94 | 0.34   | 0.45   | 0.68    | 0.33   | 0.41   |
| 754666 | 351.42 | 1.92  | -5.43 | 72.19 | 3    | 2   | 3   | 1    | 0.98 | 0.19 | 0.19 | 0    | 0.02 | 0.98 | 0.81   | 0.63   | 0.72    | 0.38   | 0.94   |
| 656158 | 283.25 | 3.7   | -5.31 | 35.53 | 1    | 1   | 3   | 0.96 | 0.97 | 0.46 | 0.46 | 0.68 | 0.18 | 0.95 | 0.92   | 0.23   | 0.74    | 0.39   | 0.69   |
| 753211 | 314.13 | 0.53  | -5.05 | 23.79 | 0    | 0   | 4   | 0.96 | 1    | 0.02 | 0.02 | 0.78 | 0.66 | 0.86 | 0.73   | 0.35   | 0.46    | 0.16   | 0.3    |
| 765699 | 359.31 | -1.11 | -5.41 | 26.02 | 4    | 1   | 3   | 0.46 | 0.63 | 0.26 | 0.26 | 0.02 | 0.16 | 0.88 | 0.86   | 0.39   | 0.73    | 0.46   | 0.63   |
| 768313 | 367.42 | 1.46  | -5.11 | 81.42 | 4    | 2   | 4   | 1    | 0.98 | 0.39 | 0.39 | 0    | 0.02 | 0.98 | 0.81   | 0.72   | 0.72    | 0.42   | 0.94   |
| 778318 | 351.47 | 2.19  | -5.71 | 55.12 | 3    | 2   | 2   | 1    | 0.98 | 0.62 | 0.62 | 0    | 0.02 | 0.98 | 0.71   | 0.64   | 0.73    | 0.4    | 0.91   |
| 703110 | 336.33 | 1.03  | -5.5  | 24.39 | 4    | 1   | 3   | 1    | 0.74 | 0.11 | 0.11 | 0    | 0.08 | 0.96 | 0.86   | 0.33   | 0.67    | 0.08   | 0.32   |
| 656155 | 280.28 | 2.56  | -4.68 | 61.55 | 1    | 2   | 3   | 0.81 | 0.97 | 0.42 | 0.42 | 0.68 | 0.22 | 0.95 | 0.94   | 0.23   | 0.76    | 0.44   | 0.73   |
| 774959 | 347.37 | 2.1   | -5.97 | 47.56 | 4    | 2   | 4   | 0.81 | 0.99 | 0.26 | 0.26 | 0.04 | 0.18 | 0.98 | 0.72   | 0.71   | 0.74    | 0.13   | 0.66   |

\*Listed are NSC-771557, NSC-768051, NSC-754670, NSC-722316, NSC-684405, NSC-676188, NSC-754664, NSC-753802, NSC-382053, NSC-754567, NSC-665497, NSC-754666, NSC-656158, NSC-753211, NSC-765699, NSC-768313, NSC-778318, NSC-703110, NSC-656155, and NSC-774959. Receptor binding energies, promiscuity, genotoxicity, skin sensitivity, and aquatic toxicity from SMARTS hits not listed.
