# Supplementary material for: Small Molecule Docking of DNA Repair Proteins Associated with Cancer Survival following PCNA Metagene Adjustment: A Potential Novel Class of Repair Inhibitors
Source: Preprints.org preprint supplement (doi:10.20944/preprints201901.0062.v1), 2019-01-08
Supplement: Supplementary file 2 [file supplementary]

**Table S1.** GBM: List of physio-chemical properties and predicted toxicology and ADME for top 20 ligands. Toxicology and ADME predictions are probabilities in the range [0,1]\*.

| Name   | MW     | LogP | LogS  | TPSA  | Rotb | HBD | HBA | BBB  | HIA  | HERG | AMES | FHM  | HBT  | TPT  | CYP1A2 | CYP2C9 | CYP2C19 | CYP2D6 | CYP3A4 |
|--------|--------|------|-------|-------|------|-----|-----|------|------|------|------|------|------|------|--------|--------|---------|--------|--------|
| 626388 | 384.47 | 4.08 | -5.84 | 37.38 | 1    | 1   | 2   | 0.94 | 0.99 | 0.1  | 0.1  | 0    | 0.02 | 0.98 | 0.37   | 0.52   | 0.7     | 0.37   | 0.64   |
| 652525 | 382.8  | 3.55 | -5.29 | 63.6  | 1    | 1   | 4   | 0.94 | 1    | 0.47 | 0.47 | 0.89 | 0.98 | 0.95 | 0.56   | 0.71   | 0.71    | 0.28   | 0.53   |
| 634724 | 392.36 | 3.01 | -4.39 | 82.06 | 1    | 1   | 6   | 0.63 | 0.99 | 0.5  | 0.5  | 1    | 0.99 | 0.95 | 0.53   | 0.71   | 0.76    | 0.31   | 0.72   |
| 641172 | 388.37 | 4.41 | -5.3  | 100.9 | 4    | 2   | 5   | 0.92 | 0.93 | 0.29 | 0.29 | 1    | 0.7  | 0.95 | 0.41   | 0.19   | 0.27    | 0.13   | 0.19   |
| 9858   | 329.44 | 4.44 | -5.36 | 75.89 | 2    | 3   | 1   | 1    | 0.97 | 0.11 | 0.11 | 1    | 0.77 | 0.96 | 0.5    | 0.17   | 0.2     | 0.35   | 0.25   |
| 660032 | 331.32 | 2.21 | -5.1  | 35.53 | 0    | 1   | 4   | 0.05 | 0.97 | 0.34 | 0.34 | 0.08 | 0.98 | 0.95 | 0.87   | 0.72   | 0.89    | 0.38   | 0.79   |
| 39310  | 244.31 | 3.26 | -5.9  | 0     | 0    | 0   | 0   | 1    | 0.98 | 0.08 | 0.08 | 0.31 | 0.36 | 0.95 | 0.82   | 0.1    | 0.41    | 0.28   | 0.21   |
| 606174 | 392.36 | 3.01 | -4.39 | 82.06 | 1    | 1   | 6   | 0.63 | 0.99 | 0.5  | 0.5  | 1    | 0.99 | 0.95 | 0.53   | 0.71   | 0.76    | 0.31   | 0.72   |
| 690391 | 391.38 | 2.69 | -4.7  | 84.86 | 1    | 2   | 6   | 0.03 | 0.95 | 0.29 | 0.29 | 0.13 | 0.94 | 0.95 | 0.31   | 0.64   | 0.83    | 0.28   | 0.81   |
| 326757 | 318.32 | 3.93 | -5.21 | 74.6  | 4    | 2   | 4   | 0.98 | 0.98 | 0.05 | 0.05 | 1    | 0.53 | 0.98 | 0.52   | 0.18   | 0.29    | 0.18   | 0.12   |
| 613799 | 347.37 | 2.6  | -5.1  | 66.4  | 1    | 2   | 4   | 0.06 | 0.97 | 0.24 | 0.24 | 0    | 0.94 | 0.95 | 0.31   | 0.49   | 0.65    | 0.14   | 0.64   |
| 369395 | 363.37 | 2.19 | -4.38 | 89.62 | 1    | 2   | 4   | 0.9  | 1    | 0.35 | 0.35 | 0.36 | 0.99 | 0.95 | 0.56   | 0.52   | 0.55    | 0.34   | 0.6    |
| 603071 | 363.37 | 2.19 | -4.38 | 89.62 | 1    | 2   | 4   | 0.9  | 1    | 0.35 | 0.35 | 0.36 | 0.99 | 0.95 | 0.56   | 0.57   | 0.56    | 0.35   | 0.66   |
| 603073 | 363.37 | 2.19 | -4.38 | 89.62 | 1    | 2   | 4   | 0.67 | 1    | 0.35 | 0.35 | 0.36 | 0.99 | 0.95 | 0.59   | 0.57   | 0.52    | 0.28   | 0.56   |
| 673596 | 392.4  | 3.34 | -4.85 | 83.83 | 2    | 2   | 5   | 0.13 | 1    | 0.2  | 0.2  | 0.99 | 0.99 | 0.95 | 0.53   | 0.79   | 0.55    | 0.26   | 0.63   |
| 94600  | 348.35 | 2.92 | -4.79 | 63.6  | 1    | 1   | 4   | 0.9  | 1    | 0.35 | 0.35 | 0.36 | 0.99 | 0.95 | 0.56   | 0.57   | 0.55    | 0.28   | 0.53   |
| 10460  | 287.36 | 2.92 | -4.13 | 75.89 | 2    | 3   | 1   | 1    | 0.97 | 0.1  | 0.1  | 1    | 0.83 | 0.98 | 0.52   | 0.17   | 0.22    | 0.44   | 0.17   |
| 96641  | 251.29 | 0.42 | -4.44 | 61.9  | 2    | 3   | 3   | 1    | 0.99 | 0.11 | 0.11 | 1    | 0.1  | 0.89 | 0.91   | 0.11   | 0.49    | 0.43   | 0.28   |
| 652524 | 363.37 | 2.19 | -4.38 | 89.62 | 1    | 2   | 4   | 0.9  | 1    | 0.35 | 0.35 | 0.36 | 0.99 | 0.95 | 0.56   | 0.52   | 0.55    | 0.34   | 0.6    |
| 688500 | 366.44 | 1.31 | -4    | 41.9  | 2    | 0   | 4   | 0.31 | 0.99 | 0    | 0    | 0    | 0.34 | 0.95 | 0.7    | 0.93   | 0.8     | 0.22   | 0.72   |

\*Listed are NSC-626388, NSC-652525, NSC-634724, NSC-641172, NSC-9858, NSC-660032, NSC-39310, NSC-606174, NSC-690391, NSC-326757, NSC-613799, NSC-369395, NSC-603071, NSC-603073, NSC-673596, NSC-94600, NSC-10460, NSC-96641, NSC-652524, and NSC-688500. Receptor binding energies, promiscuity, genotoxicity, skin sensitivity, and aquatic toxicity from SMARTS hits not listed.

**Table S2.** Melanoma: List of physio-chemical properties and predicted toxicology and ADME for top 20 ligands. Toxicology and ADME predictions are probabilities in the range [0,1]\*.

| Name   | MW     | LogP  | LogS  | TPSA   | Rotb | HBD | HBA | BBB  | HIA  | HERG | AMES | FHM  | HBT  | TPT  | CYP1A2 | CYP2C9 | CYP2C19 | CYP2D6 | CYP3A4 |
|--------|--------|-------|-------|--------|------|-----|-----|------|------|------|------|------|------|------|--------|--------|---------|--------|--------|
| 713198 | 389.32 | 2.16  | -5.86 | 143.46 | 4    | 2   | 5   | 1    | 0.7  | 0.82 | 0.82 | 1    | 0.05 | 0.98 | 0.63   | 0.35   | 0.31    | 0.01   | 0.33   |
| 667933 | 387.39 | 1.04  | -2.97 | 124.3  | 5    | 4   | 7   | 1    | 0.98 | 0.5  | 0.5  | 1    | 0.53 | 0.94 | 0.43   | 0.54   | 0.62    | 0.42   | 0.35   |
| 679749 | 314.29 | 4.62  | -5.23 | 68.28  | 1    | 0   | 4   | 1    | 0.93 | 0.02 | 0.02 | 1    | 0.91 | 0.98 | 0.52   | 0.27   | 0.47    | 0.08   | 0.38   |
| 707982 | 390.47 | 3.63  | -5.73 | 38.77  | 5    | 1   | 3   | 0.99 | 0.99 | 0.49 | 0.49 | 0.9  | 0.56 | 0.95 | 0.2    | 0.36   | 0.32    | 0.1    | 0.39   |
| 745321 | 342.82 | 2.78  | -3.85 | 56.13  | 0    | 1   | 3   | 0.25 | 0.98 | 0.69 | 0.69 | 0    | 0    | 0.98 | 0.37   | 0.66   | 0.62    | 0.33   | 0.6    |
| 714363 | 351.4  | -0.03 | -4.8  | 70.5   | 3    | 2   | 5   | 0.99 | 0.97 | 0.42 | 0.42 | 0    | 0.09 | 0.96 | 0.82   | 0.35   | 0.64    | 0.35   | 0.68   |
| 643416 | 360.41 | 3.22  | -5.28 | 46.61  | 2    | 1   | 3   | 0.63 | 0.99 | 0.08 | 0.08 | 0    | 0.02 | 0.98 | 0.51   | 0.6    | 0.75    | 0.33   | 0.68   |
| 380856 | 366.37 | 4.46  | -4.93 | 103.39 | 2    | 0   | 3   | 0.07 | 0.96 | 0.24 | 0.24 | 0    | 0.52 | 0.96 | 0.74   | 0.22   | 0.84    | 0.3    | 0.38   |
| 649750 | 334.33 | -0.28 | -5.7  | 41.46  | 3    | 1   | 4   | 0.95 | 0.27 | 0.4  | 0.4  | 1    | 0.59 | 0.95 | 0.95   | 0.36   | 0.94    | 0.23   | 0.24   |
| 27034  | 290.23 | 3.06  | -3.39 | 122.18 | 0    | 2   | 6   | 0.58 | 0.98 | 0.07 | 0.07 | 0.99 | 0.83 | 0.95 | 0.43   | 0.19   | 0.35    | 0.14   | 0.12   |
| 656160 | 299.71 | 3.92  | -5.59 | 35.53  | 1    | 1   | 3   | 0.78 | 0.97 | 0.27 | 0.27 | 0.04 | 0.05 | 0.95 | 0.89   | 0.38   | 0.85    | 0.38   | 0.7    |
| 690040 | 384.58 | 2.74  | -3.65 | 41.13  | 1    | 2   | 3   | 0.98 | 0.98 | 0.78 | 0.78 | 0.18 | 0.43 | 0.51 | 0.08   | 0.11   | 0.46    | 0.65   | 0.28   |
| 672425 | 334.33 | 1.8   | -5.03 | 80.39  | 3    | 2   | 5   | 0.5  | 0.97 | 0.18 | 0.18 | 0    | 0.2  | 0.95 | 0.53   | 0.56   | 0.7     | 0.15   | 0.41   |
| 750908 | 367.31 | 1.68  | -4.19 | 146.29 | 7    | 3   | 3   | 0.42 | 0.98 | 0.18 | 0.18 | 1    | 0.76 | 0.95 | 0.66   | 0.45   | 0.77    | 0.03   | 0.43   |
| 643735 | 334.33 | 1.8   | -5.03 | 80.39  | 3    | 2   | 5   | 0.5  | 0.97 | 0.18 | 0.18 | 0    | 0.2  | 0.95 | 0.53   | 0.56   | 0.7     | 0.15   | 0.41   |
| 677959 | 388.59 | 2.85  | -1.52 | 46.94  | 1    | 2   | 4   | 0.93 | 0.95 | 0.05 | 0.05 | 0.91 | 0.75 | 0.45 | 0.01   | 0.04   | 0.06    | 0.11   | 0.04   |
| 194618 | 304.3  | 4.82  | -5.23 | 74.6   | 0    | 2   | 4   | 0.92 | 0.98 | 0.12 | 0.12 | 0.92 | 0.7  | 0.98 | 0.7    | 0.19   | 0.26    | 0.2    | 0.13   |
| 656159 | 283.25 | 3.7   | -5.31 | 35.53  | 1    | 1   | 3   | 0.68 | 0.97 | 0.61 | 0.61 | 0.91 | 0.18 | 0.95 | 0.92   | 0.23   | 0.74    | 0.39   | 0.69   |
| 658142 | 351.36 | 0.56  | -2.73 | 81.08  | 2    | 2   | 5   | 0.31 | 0.98 | 0.06 | 0.06 | 0.04 | 0.68 | 0.98 | 0.55   | 0.54   | 0.8     | 0.27   | 0.49   |
| 656204 | 335.38 | 3.52  | -3.43 | 83.83  | 0    | 2   | 3   | 0.98 | 0.33 | 0.84 | 0.84 | 0    | 0.13 | 0.33 | 0.46   | 0.87   | 0.89    | 0.19   | 0.56   |

\*Listed are NSC-713198, NSC-667933, NSC-679749, NSC-707982, NSC-745321, NSC-714363, NSC-643416, NSC-380856, NSC-649750, NSC-27034, NSC-656160, NSC-690040, NSC-672425, NSC-750908, NSC-643735, NSC-677959, NSC-194618, NSC-656159, NSC-658142, and NSC-656204. Receptor binding energies, promiscuity, genotoxicity, skin sensitivity, and aquatic toxicity from SMARTS hits not listed.

**Table S3.** Ovarian: List of physio-chemical properties and predicted toxicology and ADME for top 20 ligands. Toxicology and ADME predictions are probabilities in the range [0,1]\*.

| Name   | MW     | LogP | LogS  | TPSA   | Rotb | HBD | HBA | BBB  | HIA  | HERG | AMES | FHM  | HBT  | TPT  | CYP1A2 | CYP2C9 | CYP2C19 | CYP2D6 | CYP3A4 |
|--------|--------|------|-------|--------|------|-----|-----|------|------|------|------|------|------|------|--------|--------|---------|--------|--------|
| 690273 | 364.35 | 3.69 | -5.74 | 130.58 | 7    | 2   | 3   | 0.99 | 0.88 | 0.04 | 0.04 | 0.76 | 0.09 | 0.89 | 0.86   | 0.26   | 0.32    | 0.05   | 0.4    |
| 720028 | 303.31 | 2.82 | -5.95 | 37.3   | 2    | 1   | 3   | 0.99 | 0.98 | 0.05 | 0.05 | 0.98 | 0.37 | 0.98 | 0.79   | 0.48   | 0.42    | 0.13   | 0.29   |
| 720447 | 278.31 | 2.32 | -5.3  | 34.14  | 2    | 2   | 2   | 0.99 | 0.94 | 0.01 | 0.01 | 1    | 0.99 | 0.98 | 0.85   | 0.53   | 0.36    | 0.02   | 0.25   |
| 720702 | 332.39 | 4.3  | -4.88 | 35.53  | 4    | 0   | 3   | 1    | 0.96 | 0.01 | 0.01 | 1    | 0.99 | 0.94 | 0.49   | 0.13   | 0.2     | 0.1    | 0.2    |
| 753018 | 378.82 | 0.05 | -5.77 | 44.62  | 4    | 2   | 5   | 0.97 | 0.99 | 0.3  | 0.3  | 0    | 0.07 | 0.88 | 0.88   | 0.63   | 0.65    | 0.11   | 0.44   |
| 722392 | 270.28 | 3.47 | -3.01 | 52.6   | 0    | 0   | 4   | 1    | 0.96 | 0.02 | 0.02 | 1    | 0.98 | 0.94 | 0.63   | 0.29   | 0.44    | 0.04   | 0.39   |
| 634398 | 326.41 | 3.87 | -5.47 | 83.5   | 4    | 2   | 2   | 0.94 | 1    | 0.02 | 0.02 | 0    | 0.76 | 0.98 | 0.48   | 0.47   | 0.66    | 0.19   | 0.36   |
| 690678 | 369.5  | 2.4  | -4.58 | 55.64  | 4    | 1   | 1   | 1    | 0.97 | 0.06 | 0.06 | 0.17 | 0.43 | 0.98 | 0.73   | 0.7    | 0.8     | 0.53   | 0.58   |
| 675223 | 309.28 | 0.53 | -4.14 | 97.29  | 4    | 1   | 3   | 0.92 | 0.99 | 0.03 | 0.03 | 0    | 0.08 | 0.89 | 0.84   | 0.46   | 0.54    | 0.04   | 0.39   |
| 656204 | 335.38 | 3.52 | -3.43 | 83.83  | 0    | 2   | 3   | 0.98 | 0.33 | 0.84 | 0.84 | 0    | 0.13 | 0.33 | 0.46   | 0.87   | 0.89    | 0.19   | 0.56   |
| 621457 | 332.18 | 2.05 | -5.97 | 46.25  | 2    | 2   | 3   | 0.37 | 0.98 | 0.5  | 0.5  | 0.01 | 0.05 | 0.89 | 0.85   | 0.31   | 0.72    | 0.26   | 0.41   |
| 726393 | 323.34 | 3.76 | -5.89 | 47.89  | 5    | 0   | 4   | 0.99 | 0.94 | 0.11 | 0.11 | 1    | 0.66 | 0.94 | 0.68   | 0.08   | 0.34    | 0.18   | 0.18   |
| 692229 | 256.25 | 3.38 | -2.82 | 63.6   | 1    | 1   | 4   | 0.54 | 0.98 | 0.02 | 0.02 | 1    | 0.98 | 0.94 | 0.36   | 0.36   | 0.59    | 0.03   | 0.57   |
| 257450 | 316.26 | 2.61 | -2.49 | 124.29 | 1    | 4   | 7   | 0.99 | 0.96 | 0.09 | 0.09 | 0.98 | 0.53 | 0.95 | 0.54   | 0.21   | 0.44    | 0.1    | 0.18   |
| 116536 | 282.25 | 2.83 | -4.65 | 121.35 | 3    | 2   | 2   | 1    | 0.98 | 0.61 | 0.61 | 0.76 | 0.02 | 0.96 | 0.76   | 0.34   | 0.5     | 0.06   | 0.27   |
| 70811  | 278.31 | 4.49 | -5.41 | 54.18  | 3    | 1   | 4   | 0.93 | 0.95 | 0.05 | 0.05 | 0.56 | 0.82 | 0.97 | 0.79   | 0.11   | 0.29    | 0.22   | 0.14   |
| 117192 | 271.7  | 3.33 | -5.3  | 53.49  | 2    | 2   | 2   | 1    | 0.98 | 0.77 | 0.77 | 0.84 | 0    | 0.96 | 0.76   | 0.5    | 0.72    | 0.12   | 0.24   |
| 753598 | 365.33 | 0.18 | -5.45 | 38.33  | 6    | 1   | 3   | 0.9  | 1    | 0.14 | 0.14 | 0    | 0.18 | 0.32 | 0.84   | 0.12   | 0.41    | 0.02   | 0.67   |
| 72881  | 254.28 | 3.14 | -3.44 | 61.69  | 4    | 2   | 3   | 0.98 | 0.95 | 0.16 | 0.16 | 0.45 | 0.15 | 0.95 | 0.7    | 0.2    | 0.24    | 0.11   | 0.18   |
| 5332   | 249.27 | 2.93 | -5.01 | 44.95  | 2    | 1   | 4   | 0.84 | 0.89 | 0.1  | 0.1  | 1    | 0.91 | 0.97 | 0.78   | 0.15   | 0.17    | 0.08   | 0.16   |

\*Listed are NSC-690273, NSC-720028, NSC-720447, NSC-720702, NSC-753018, NSC-722392, NSC-634398, NSC-690678, NSC-675223, NSC-656204, NSC-621457, NSC-726393, NSC-692229, NSC-257450, NSC-116536, NSC-70811, NSC-117192, NSC-753598, NSC-72881, and NSC-5332. Receptor binding energies, promiscuity, genotoxicity, skin sensitivity, and aquatic toxicity from SMARTS hits not listed.

**Table S4.** Renal papillary: List of physio-chemical properties and predicted toxicology and ADME for top 20 ligands. Toxicology and ADME predictions are probabilities in the range [0,1]\*.

| Name   | MW     | LogP  | LogS  | TPSA   | Rotb | HBD | HBA | BBB  | HIA  | HERG | AMES | FHM  | HBT  | TPT  | CYP1A2 | CYP2C9 | CYP2C19 | CYP2D6 | CYP3A4 |
|--------|--------|-------|-------|--------|------|-----|-----|------|------|------|------|------|------|------|--------|--------|---------|--------|--------|
| 606174 | 392.36 | 3.01  | -4.39 | 82.06  | 1    | 1   | 6   | 0.63 | 0.99 | 0.5  | 0.5  | 1    | 0.99 | 0.95 | 0.53   | 0.71   | 0.76    | 0.31   | 0.72   |
| 668836 | 390.52 | 4.05  | -4.62 | 37.38  | 1    | 1   | 2   | 0.94 | 0.99 | 0.08 | 0.08 | 0    | 0.16 | 0.98 | 0.3    | 0.39   | 0.53    | 0.29   | 0.46   |
| 696921 | 368.35 | -1.84 | -3.04 | 133.27 | 4    | 1   | 5   | 0.19 | 0.97 | 0.09 | 0.09 | 1    | 0.17 | 0.33 | 0.64   | 0.2    | 0.44    | 0.14   | 0.12   |
| 682298 | 347.37 | 2.68  | -5.01 | 69.39  | 1    | 1   | 4   | 0.71 | 0.98 | 0.35 | 0.35 | 0    | 0.99 | 0.95 | 0.75   | 0.72   | 0.54    | 0.19   | 0.53   |
| 766292 | 365.36 | -0.99 | -5.93 | 29.1   | 6    | 1   | 4   | 0.21 | 0.41 | 0.56 | 0.56 | 0.02 | 0.02 | 0.95 | 0.76   | 0.5    | 0.66    | 0.43   | 0.54   |
| 249910 | 382.8  | 3.55  | -5.29 | 63.6   | 1    | 1   | 4   | 0.94 | 1    | 0.47 | 0.47 | 0.89 | 0.98 | 0.95 | 0.56   | 0.7    | 0.71    | 0.2    | 0.64   |
| 766871 | 332.32 | -3.09 | -4.41 | 49.33  | 4    | 2   | 6   | 0.26 | 1    | 0.05 | 0.05 | 0    | 0.05 | 0.88 | 0.68   | 0.42   | 0.48    | 0.07   | 0.49   |
| 702015 | 389.4  | 3.25  | -4.87 | 68.2   | 4    | 1   | 4   | 0.96 | 0.8  | 0.48 | 0.48 | 0    | 0.07 | 0.96 | 0.27   | 0.57   | 0.6     | 0.19   | 0.62   |
| 682571 | 292.33 | 2.82  | -5.64 | 34.14  | 2    | 2   | 2   | 0.99 | 0.94 | 0.01 | 0.01 | 1    | 0.99 | 0.98 | 0.85   | 0.59   | 0.45    | 0.01   | 0.27   |
| 726184 | 313.26 | -0.52 | -4.38 | 69.91  | 1    | 0   | 3   | 1    | 0.99 | 0.17 | 0.17 | 1    | 0.85 | 0.95 | 0.91   | 0.11   | 0.41    | 0.15   | 0.28   |
| 683608 | 311.3  | -1.56 | -3.01 | 120.37 | 6    | 4   | 5   | 0.65 | 0.99 | 0.29 | 0.29 | 1    | 0.12 | 0.95 | 0.41   | 0.23   | 0.22    | 0.21   | 0.24   |
| 756420 | 353.39 | -1.02 | -4.16 | 46.25  | 3    | 2   | 4   | 0.85 | 0.97 | 0.05 | 0.05 | 0    | 0.04 | 0.95 | 0.71   | 0.2    | 0.23    | 0.38   | 0.17   |
| 751644 | 354.83 | 1.79  | -5.33 | 41.13  | 4    | 2   | 3   | 0.99 | 0.98 | 0.02 | 0.02 | 0    | 0.05 | 0.89 | 0.44   | 0.62   | 0.61    | 0.26   | 0.52   |
| 757177 | 313.74 | -0.06 | -5.2  | 67.15  | 4    | 3   | 3   | 1    | 0.95 | 0.28 | 0.28 | 1    | 0.02 | 0.93 | 0.8    | 0.19   | 0.58    | 0.31   | 0.43   |
| 407807 | 390.51 | 3.29  | -1.5  | 86.99  | 1    | 3   | 4   | 0.79 | 0.91 | 0.02 | 0.02 | 1    | 0.97 | 0.69 | 0.02   | 0.02   | 0.07    | 0.01   | 0.04   |
| 726364 | 352.38 | 3.24  | -3.76 | 71.36  | 4    | 1   | 5   | 0.49 | 0.67 | 0.13 | 0.13 | 0    | 0.45 | 0.95 | 0.13   | 0.53   | 0.35    | 0.12   | 0.51   |
| 756350 | 345.36 | -2.11 | -5.21 | 33.62  | 5    | 1   | 6   | 0.99 | 0.98 | 0.2  | 0.2  | 0.44 | 0.27 | 0.74 | 0.92   | 0.34   | 0.43    | 0.14   | 0.62   |
| 772545 | 381.43 | -2.45 | -4.2  | 44.81  | 6    | 2   | 4   | 0.83 | 0.95 | 0.21 | 0.21 | 1    | 0.07 | 0    | 0.8    | 0.25   | 0.5     | 0.16   | 0.57   |
| 626735 | 308.37 | 3.1   | -4.39 | 49.74  | 3    | 0   | 3   | 0.86 | 0.98 | 0.17 | 0.17 | 1    | 0.3  | 0.98 | 0.17   | 0.29   | 0.3     | 0.75   | 0.28   |
| 729037 | 311.34 | 0.36  | -2.61 | 110.73 | 1    | 4   | 3   | 0.28 | 0.99 | 0.14 | 0.14 | 0    | 0.69 | 1    | 0.61   | 0.19   | 0.3     | 0.08   | 0.21   |

\*Listed are NSC-606174, NSC-668836, NSC-696921, NSC-682298, NSC-766292, NSC-249910, NSC-766871, NSC-702015, NSC-682571, NSC-726184, NSC-683608, NSC-756420, NSC-751644, NSC-757177, NSC-407807, NSC-726364, NSC-756350, NSC-772545, NSC-626735, and NSC-729037. Receptor binding energies, promiscuity, genotoxicity, skin sensitivity, and aquatic toxicity from SMARTS hits not listed.

Figure S1. 2D structures of top 20 drug-like ligands for GBM.\*

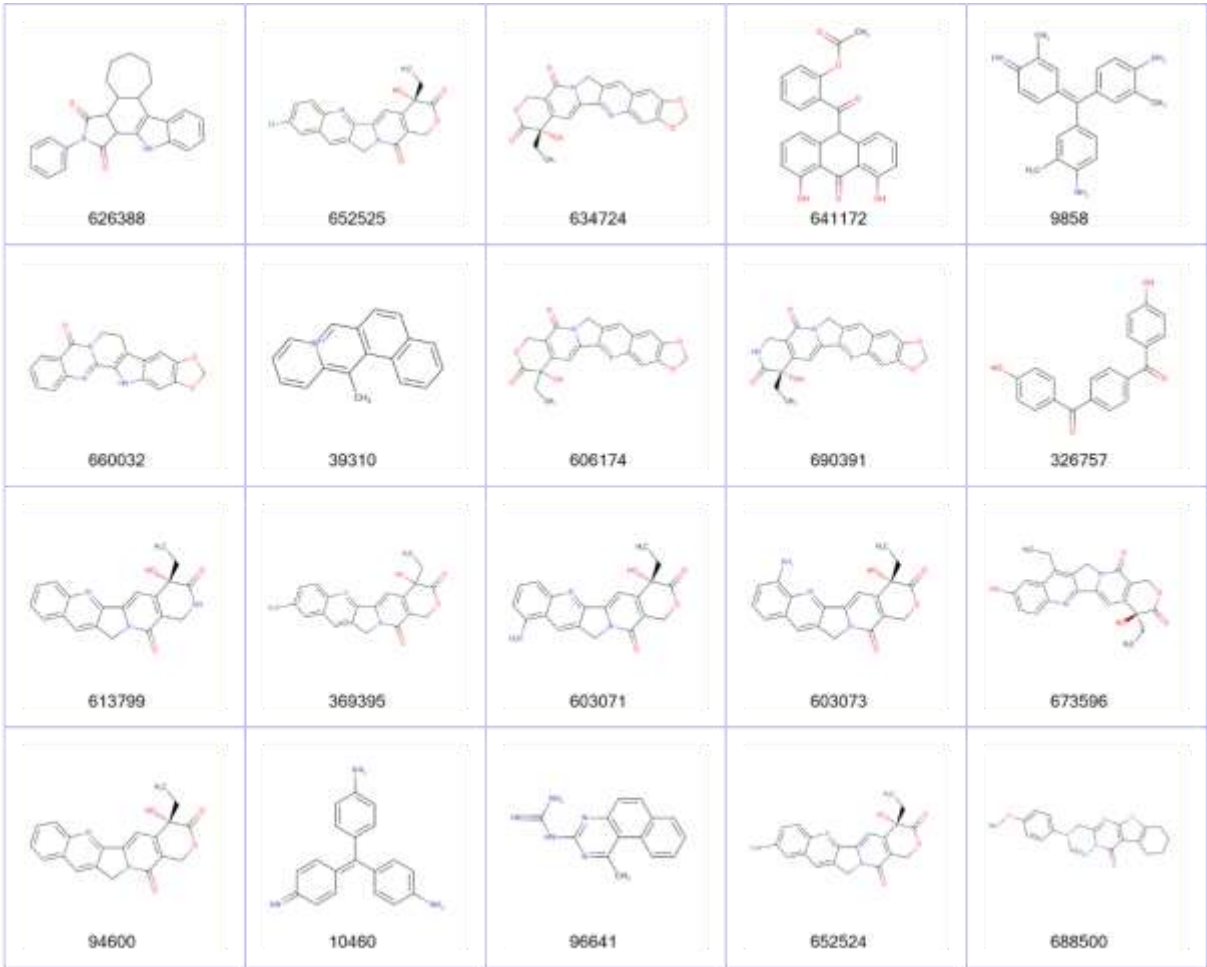

\*Listed are NSC-626388, NSC-652525, NSC-634724, NSC-641172, NSC-9858, NSC-660032, NSC-39310, NSC-606174, NSC-690391, NSC-326757, NSC-613799, NSC-369395, NSC-603071, NSC-603073, NSC-673596, NSC-94600, NSC-10460, NSC-96641, NSC-652524, and NSC-688500.

Figure S2. 2D structures of top 20 drug-like ligands for melanoma.\*

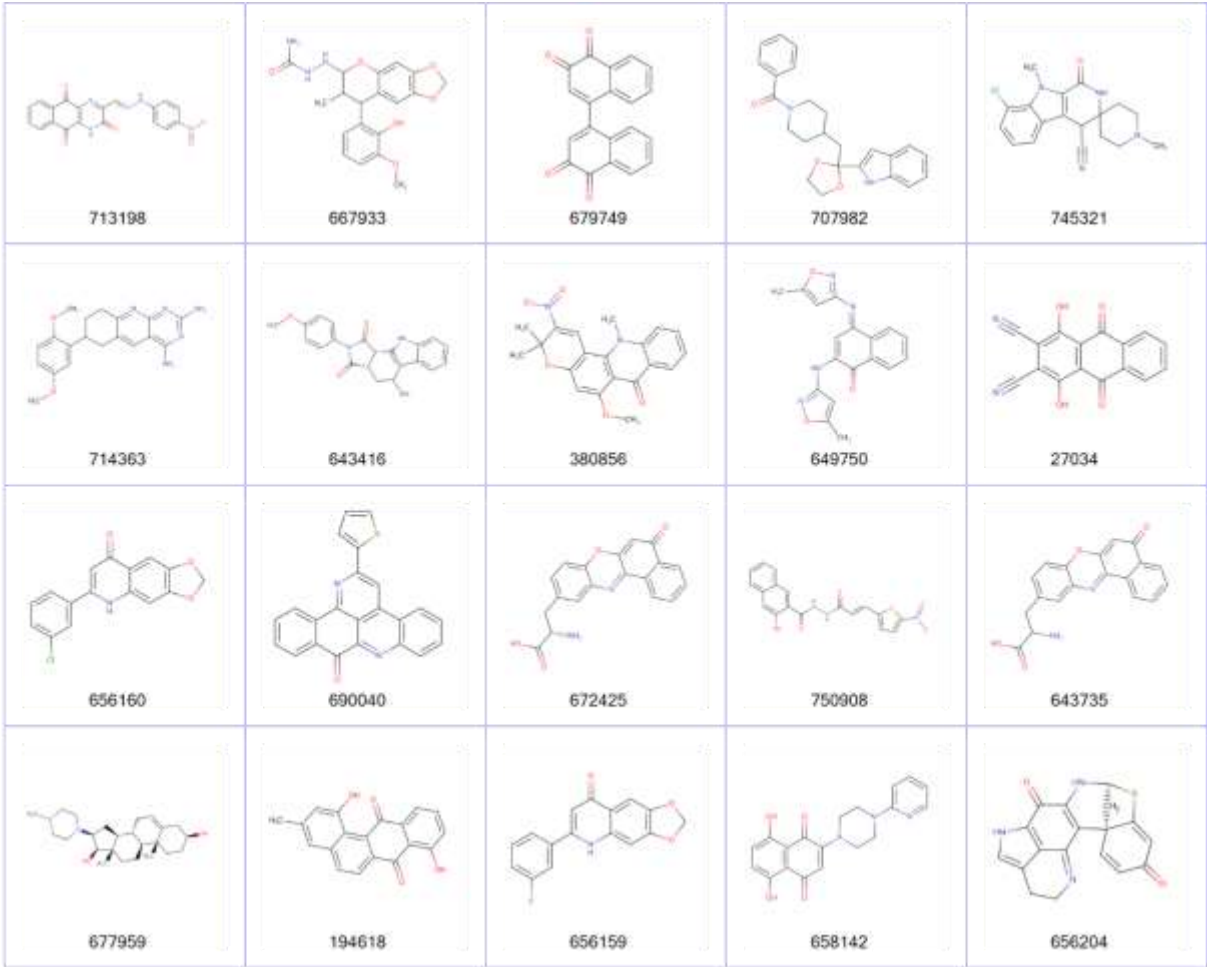

\*Listed are NSC-713198, NSC-667933, NSC-679749, NSC-707982, NSC-745321, NSC-714363, NSC-643416, NSC-380856, NSC-649750, NSC-27034, NSC-656160, NSC-690040, NSC-672425, NSC-750908, NSC-643735, NSC-677959, NSC-194618, NSC-656159, NSC-658142, and NSC-656204.

**Figure S3.** 2D structures of top 20 drug-like ligands for ovarian cancer.\*

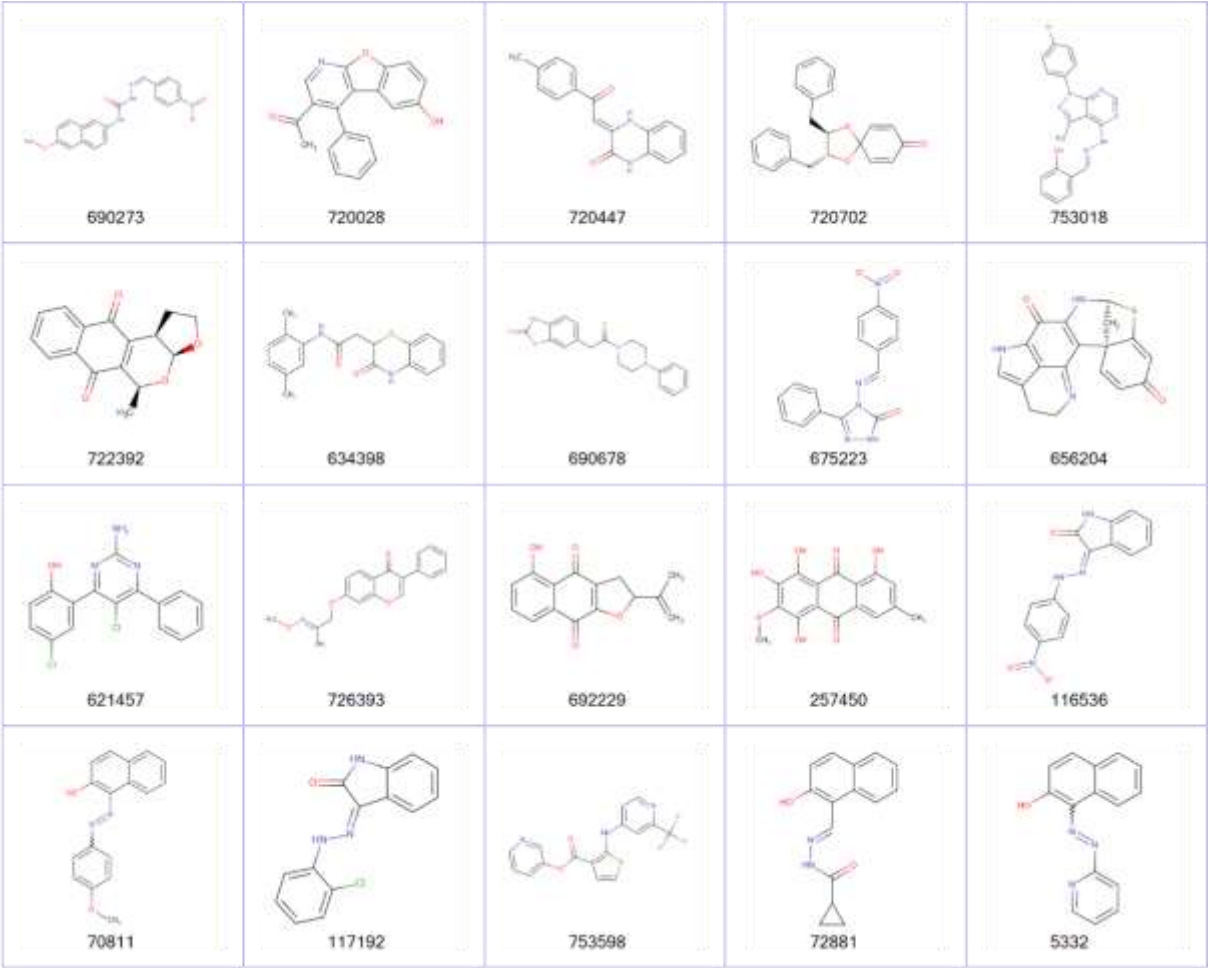

\*Listed are NSC-690273, NSC-720028, NSC-720447, NSC-720702, NSC-753018, NSC-722392, NSC-634398, NSC-690678, NSC-675223, NSC-656204, NSC-621457, NSC-726393, NSC-692229, NSC-257450, NSC-116536, NSC-70811, NSC-117192, NSC-753598, NSC-72881, and NSC-5332.

**Figure S4.** 2D structures of top 20 drug-like ligands for renal papillary cancer.\*

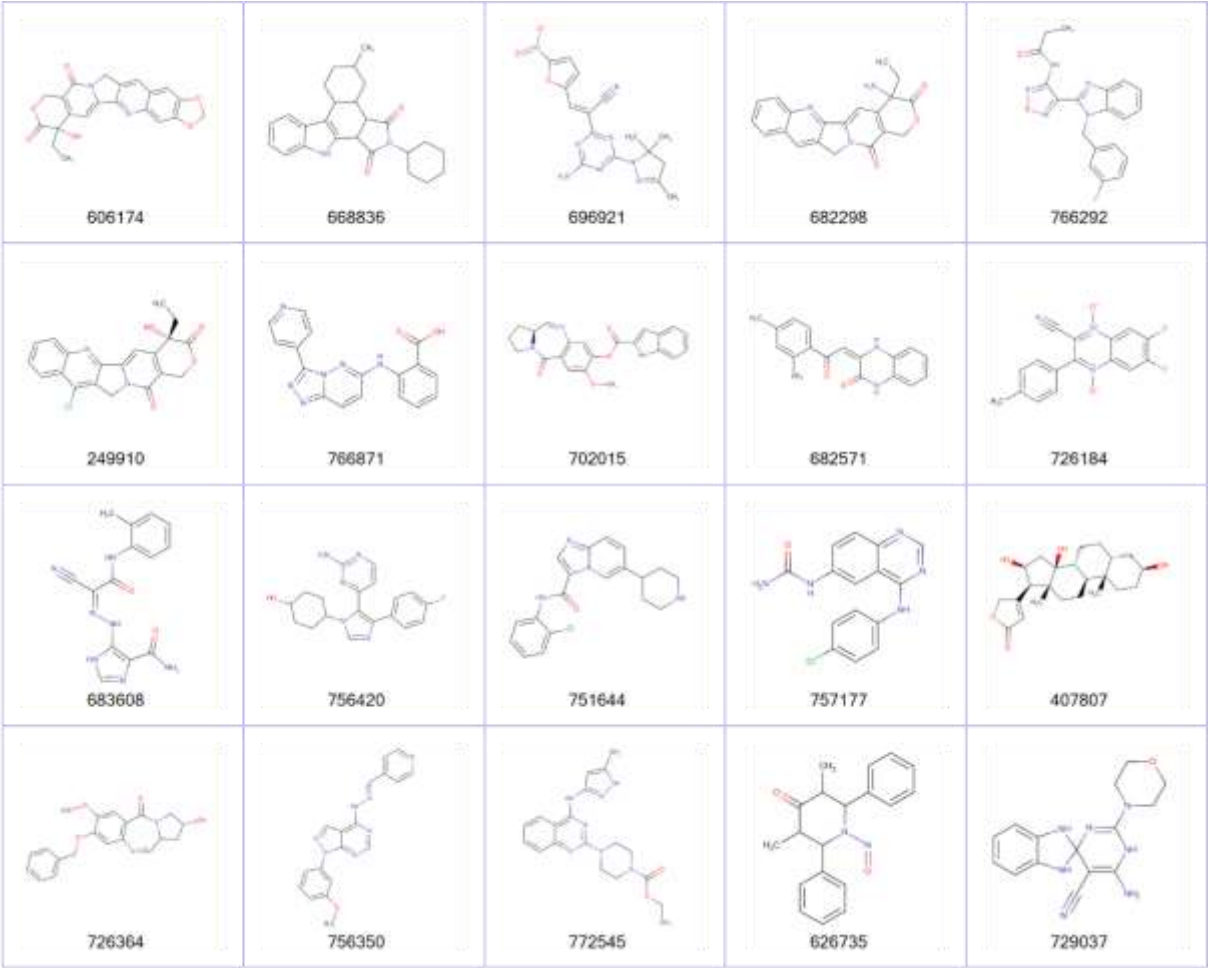

\*Listed are NSC-606174, NSC-668836, NSC-696921, NSC-682298, NSC-766292, NSC-249910, NSC-766871, NSC-702015, NSC-682571, NSC-726184, NSC-683608, NSC-756420, NSC-751644, NSC-757177, NSC-407807, NSC-726364, NSC-756350, NSC-772545, NSC-626735, and NSC-729037.
